# Supplementary material
Source: HighWire-hosted journal article supplement (https://bmjopen.bmj.com/content/12/6/e064142)
Supplement: inline-supplementary-material-1 [file inline-supplementary-material-1.pdf]

Supplementary Table 1: Variables that will be collected from the electronic health records

| Health Index              | Comorbidity Index                                                                                                                                                                                                                                                                                                                                                                                                                                                                                                                                                                                                                                                 | Elixhauser Comorbidity Index                                                                                                                                                                                                                                                                                                                                                                                                                                                                                                                                                                                                                                                                                                                                                                                                                                                                                                                                                                                       | Function Related Indicators                                                                                                                                                                                                                                                                                                                                                                                                                                                                                                                                               | Pulmonary Function                                                                                                                                                                                                        |
|---------------------------|-------------------------------------------------------------------------------------------------------------------------------------------------------------------------------------------------------------------------------------------------------------------------------------------------------------------------------------------------------------------------------------------------------------------------------------------------------------------------------------------------------------------------------------------------------------------------------------------------------------------------------------------------------------------|--------------------------------------------------------------------------------------------------------------------------------------------------------------------------------------------------------------------------------------------------------------------------------------------------------------------------------------------------------------------------------------------------------------------------------------------------------------------------------------------------------------------------------------------------------------------------------------------------------------------------------------------------------------------------------------------------------------------------------------------------------------------------------------------------------------------------------------------------------------------------------------------------------------------------------------------------------------------------------------------------------------------|---------------------------------------------------------------------------------------------------------------------------------------------------------------------------------------------------------------------------------------------------------------------------------------------------------------------------------------------------------------------------------------------------------------------------------------------------------------------------------------------------------------------------------------------------------------------------|---------------------------------------------------------------------------------------------------------------------------------------------------------------------------------------------------------------------------|
| Variables to be extracted | <ol style="list-style-type: none"> <li>1. Myocardial Infarction</li> <li>2. Congestive heart failure</li> <li>3. Peripheral vascular disease</li> <li>4. Cerebrovascular disease</li> <li>5. Dementia</li> <li>6. Chronic pulmonary disease</li> <li>7. Rheumatologic disease</li> <li>8. Ulcer disease</li> <li>9. Mild liver disease</li> <li>10. Moderate or severe liver disease</li> <li>11. Diabetes</li> <li>12. Hemiplegia or paraplegia</li> <li>13. Renal disease</li> <li>14. Diabetes with complications</li> <li>15. Any malignancy, including lymphoma and leukemia (except lung cancer)</li> <li>16. Metastatic tumor</li> <li>17. AIDS</li> </ol> | <ol style="list-style-type: none"> <li>1. Diabetes without complications</li> <li>2. Diabetes with complications</li> <li>3. Rheumatic diseases</li> <li>4. Renal failure</li> <li>5. Congestive heart failure</li> <li>6. Peripheral vascular disease</li> <li>7. Tumor</li> <li>8. Peptic ulcer disease without bleeding</li> <li>9. Cancer with metastasis</li> <li>10. Paralysis</li> <li>11. AIDS</li> <li>12. Liver disease</li> <li>13. Chronic lung disease</li> <li>14. Pulmonary circulation disease</li> <li>15. Hypertension</li> <li>16. Psychosis</li> <li>17. Other neurologic diseases</li> <li>18. Hypothyroidism</li> <li>19. Depression</li> <li>20. Obesity</li> <li>21. Iron deficiency anemia</li> <li>22. Fluid and electrolyte disorder</li> <li>23. Valvular disease</li> <li>24. Alcohol use disorder</li> <li>25. Coagulopathy</li> <li>26. Anemia due to blood loss</li> <li>27. Drug abuse</li> <li>28. Weight loss</li> <li>29. Lymphoma</li> <li>30. Cardiac arrhythmias</li> </ol> | <ol style="list-style-type: none"> <li>1. Mobility limitation</li> <li>2. Blood transfusion</li> <li>3. Oxygen at home</li> <li>4. Supplemental nutrition at home</li> <li>5. Hip or pelvic fracture</li> <li>6. Urinary catheter at home</li> <li>7. Chronic skin ulcer</li> <li>8. Pneumonia</li> <li>9. Delirium/dementia/Alzheimer</li> <li>10. Bone marrow failure</li> <li>11. Depression</li> <li>12. Respiratory failure</li> <li>13. Sepsis</li> <li>14. Malnutrition/unintentional weight loss</li> <li>15. Fall-related injury</li> <li>16. Syncope</li> </ol> | <ol style="list-style-type: none"> <li>1. Presence of COPD</li> <li>2. Utilization of spirometry</li> <li>3. Forced expiratory volume (FEV1/FVC)</li> <li>4. Ejection Fraction data for heart failure patients</li> </ol> |

Abbreviations: COPD=Chronic obstructive pulmonary disease; FEV= Forced expiratory volume; FVC= Forced vital capacity; AIDS=Acquired Immunodeficiency syndrome.
